# Supplementary material for: Association between Sleep Timing, Being Overweight and Meal and Snack Consumption in Children and Adolescents in Southern Brazil
Source: MDPI journal article supplement (doi:10.3390/ijerph20186791), 2023-09-21
Supplement: s1 [file s1]

Figure S1. Flow chart of the study design

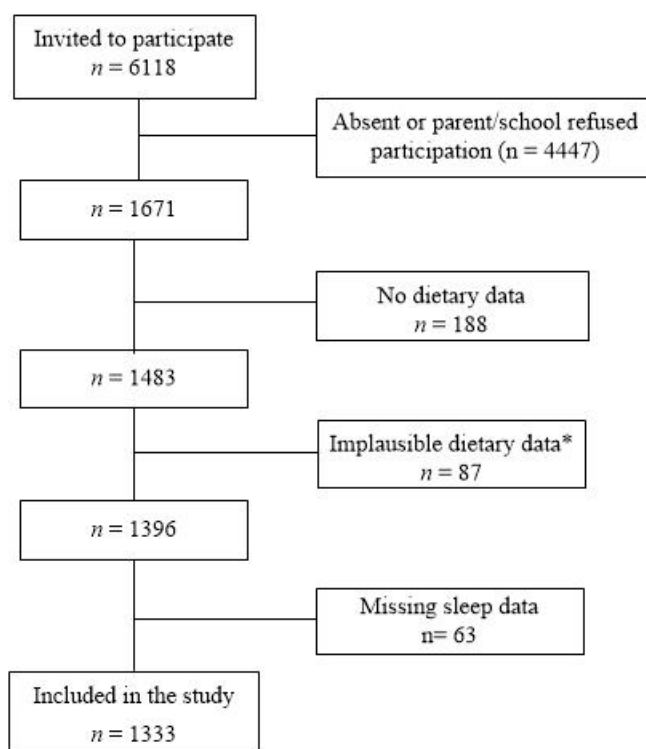

\*Children and adolescents who reported less than three food items per day or consumption of a number of items greater than the mean + 3 standard deviations.

Table S1. Description of sleep variables according to the midpoint of sleep. Florianopolis, Brazil, 2018/2019.

| Sleep variables                  | Early<br>n=460                            | Intermediate<br>n=434                     | Late<br>n=439                             |
|----------------------------------|-------------------------------------------|-------------------------------------------|-------------------------------------------|
|                                  | median (p25; p75)                         | median (p25; p75)                         | median (p25; p75)                         |
| <b>Sleep duration (h)</b>        |                                           |                                           |                                           |
| Total                            | <b>9.64 (9.08; 10.29)<sup>a</sup></b>     | <b>9.64 (9.11; 10.43)<sup>c</sup></b>     | <b>10.14 (9.29; 11.00)<sup>a,c</sup></b>  |
| Weekday                          | <b>9.50 (8.75; 10.00)<sup>a</sup></b>     | <b>9.50 (8.50; 10.50)<sup>c</sup></b>     | <b>10.00 (9.00; 11.00)<sup>a,c</sup></b>  |
| Weekend                          | 10.00 (9.50; 11.00)                       | 10.50 (10.00; 11.00)                      | 10.50 (9.50; 11.00)                       |
| <b>Bedtime (local time)</b>      |                                           |                                           |                                           |
| Weekday                          | <b>21:30 (21:00; 22:00)<sup>a,b</sup></b> | <b>22:00 (21:40; 22:35)<sup>b,c</sup></b> | <b>23:00 (22:00; 23:30)<sup>a,c</sup></b> |
| Weekend                          | <b>22:00 (22:00; 22:30)<sup>a,b</sup></b> | <b>23:00 (23:00; 23:30)<sup>b,c</sup></b> | <b>0:00 (23:35; 1:00)<sup>a,c</sup></b>   |
| <b>Wake-up time (local time)</b> |                                           |                                           |                                           |
| Weekday                          | <b>6:40 (6:30; 7:00)<sup>a,b</sup></b>    | <b>7:00 (6:30; 8:30)<sup>b,c</sup></b>    | <b>9:00 (7:00; 10:00)<sup>a,c</sup></b>   |
| Weekend                          | <b>8:00 (8:00; 9:00)<sup>a,b</sup></b>    | <b>9:30 (9:00; 10:00)<sup>b,c</sup></b>   | <b>10:30 (10:00; 11:00)<sup>a,c</sup></b> |
| <b>MSFsc</b>                     | <b>3:01 (2:38; 3:17)<sup>a,b</sup></b>    | <b>3:35 (3:26; 4:11)<sup>b,c</sup></b>    | <b>5:05 (4:38; 5:41)<sup>a,c</sup></b>    |

Bold font and superscripts indicate: Kruskal-Wallis test, **a** that the first and third tertile are significantly different at 5% level; **b** that the first and second tertile are significantly different at 5% level; **c** that the second and third tertiles are significantly different at 5% level.

Table S2. Associations between the midpoint of sleep and mid-afternoon snack, lunch, and dinner. Florianopolis, Brazil, 2018/2019.

|                                               | Lunch                |       |                                      |       | Mid-afternoon snack    |              |                                      |              | Dinner               |       |                                      |       |
|-----------------------------------------------|----------------------|-------|--------------------------------------|-------|------------------------|--------------|--------------------------------------|--------------|----------------------|-------|--------------------------------------|-------|
|                                               | Crude<br>OR (95% CI) | p     | Adjusted <sup>a</sup><br>OR (95% CI) | p     | Crude<br>OR (95% CI)   | p            | Adjusted <sup>a</sup><br>OR (95% CI) | p            | Crude<br>OR (95% CI) | p     | Adjusted <sup>a</sup><br>OR (95% CI) | p     |
| <b>Early</b>                                  | 1.21(0.70;2.09)      | 0.451 | 1.18(0.60;2.33)                      | 0.590 | 0.54(0.25;1.17)        | 0.104        | 0.50(0.22;1.15)                      | 0.093        | 0.91(0.59;1.43)      | 0.656 | 0.95(0.54;1.67)                      | 0.838 |
| <b>Intermediate</b>                           | 1                    | -     | 1                                    | -     | 1                      | -            | 1                                    | -            | 1                    | -     | 1                                    | -     |
| <b>Late</b>                                   | 2.24(0.56;9.06)      | 0.223 | 2.68(0.57;12.67)                     | 0.184 | 0.57(0.33;1.00)        | 0.050        | 0.47(0.20;1.09)                      | 0.074        | 1.02(0.67;1.56)      | 0.912 | 1.25(0.89;1.76)                      | 0.167 |
| <b>Gender</b>                                 |                      |       |                                      |       |                        |              |                                      |              |                      |       |                                      |       |
| Male                                          | 1                    | -     | 1                                    | -     | 1                      | -            | 1                                    | -            | 1                    | -     | 1                                    | -     |
| Female                                        | 0.94(0.43;2.08)      | 0.869 | 0.95(0.45;2.04)                      | 0.890 | <b>1.74(1.17;2.58)</b> | <b>0.011</b> | <b>1.57(1.00;2.45)</b>               | <b>0.049</b> | 0.78(0.43;1.41)      | 0.368 | 0.84(0.41;1.72)                      | 0.593 |
| <b>Age</b>                                    |                      |       |                                      |       |                        |              |                                      |              |                      |       |                                      |       |
| 7-10 years                                    | 1                    | -     | 1                                    | -     | 1                      | -            | 1                                    | -            | 1                    | -     | 1                                    | -     |
| 11-14 years                                   | 1.71(0.64;4.52)      | 0.245 | 2.00(0.81;4.98)                      | 0.119 | 0.92(0.51;1.67)        | 0.761        | 1.02(0.59;1.78)                      | 0.931        | 1.36(0.61;3.00)      | 0.406 | 1.35(0.64;2.83)                      | 0.386 |
| <b>Screen use</b>                             |                      |       |                                      |       |                        |              |                                      |              |                      |       |                                      |       |
| never                                         | 1                    | -     | 1                                    | -     | 1                      | -            | 1                                    | -            | 1                    | -     | 1                                    | -     |
| once                                          | 1.20(0.22;6.60)      | 0.810 | 0.96(0.22;4.30)                      | 0.958 | 1.19(0.72;1.96)        | 0.451        | 1.10(0.58;2.10)                      | 0.746        | 0.91(0.61;1.37)      | 0.627 | 0.84(0.48;1.48)                      | 0.509 |
| twice                                         | 1.02(0.15;6.97)      | 0.980 | 1.02(0.13;8.11)                      | 0.987 | 1.04(0.45;2.43)        | 0.911        | 1.02(0.42;2.46)                      | 0.970        | 0.61(0.29;1.28)      | 0.168 | 0.62(0.35;1.11)                      | 0.098 |
| three times or more                           | 0.56(0.16;1.93)      | 0.319 | 0.43(0.14;1.36)                      | 0.131 | 1.18(0.69;2.01)        | 0.506        | 1.19(0.70;2.04)                      | 0.469        | 1.45(0.82;2.58)      | 0.175 | 1.30(0.69;2.45)                      | 0.370 |
| <b>Physical activity</b>                      |                      |       |                                      |       |                        |              |                                      |              |                      |       |                                      |       |
| 0-2 times                                     | 1                    | -     | 1                                    | -     | 1                      | -            | 1                                    | -            | 1                    | -     | 1                                    | -     |
| 3-4 times                                     | 1.17(0.38;3.57)      | 0.760 | 1.22(0.38;3.90)                      | 0.713 | 1.04(0.62;1.73)        | 0.880        | 0.96(0.62;1.49)                      | 0.834        | 1.60(0.94;2.71)      | 0.076 | 1.43(0.74;2.76)                      | 0.247 |
| ≥5 times                                      | 6.30(0.60;66.39)     | 0.111 | 7.48(0.57;97.85)                     | 0.110 | 1.74(1.06;2.87)        | 0.033        | 1.56(1.10;2.21)                      | 0.018        | 5.35(1.35;21.26)     | 0.022 | 4.78(1.25;18.20)                     | 0.027 |
| <b>Type of school</b>                         |                      |       |                                      |       |                        |              |                                      |              |                      |       |                                      |       |
| Public                                        | 1                    | -     | 1                                    | -     | 1                      | -            | 1                                    | -            | 1                    | -     | 1                                    | -     |
| Private                                       | 2.44(1.22;4.89)      | 0.018 | 2.18(0.77;6.17)                      | 0.123 | 1.23(0.95;1.59)        | 0.107        | 1.33(0.82;2.16)                      | 0.213        | 1.61(0.95;2.74)      | 0.073 | 1.23(0.57;2.82)                      | 0.586 |
| <b>Maternal education, years of schooling</b> |                      |       |                                      |       |                        |              |                                      |              |                      |       |                                      |       |
| 0-8                                           | 1                    | -     | 1                                    | -     | 1                      | -            | 1                                    | -            | 1                    | -     | 1                                    | -     |
| 9-11                                          | 2.37(1.03;5.43)      | 0.043 | 2.19(1.07;4.50)                      | 0.036 | 1.85(0.85;4.04)        | 0.107        | 1.62(0.88;2.96)                      | 0.107        | 0.70(0.48;1.01)      | 0.054 | 0.66(0.52;0.84)                      | 0.004 |
| ≥12                                           | 3.50(1.37;8.90)      | 0.014 | 2.40(0.52;11.22)                     | 0.230 | 1.23(0.78;1.92)        | 0.329        | 0.86(0.39;1.90)                      | 0.669        | 1.25(0.79;1.98)      | 0.297 | 1.04(0.54;2.01)                      | 0.901 |
| <b>Day of the food intake report</b>          |                      |       |                                      |       |                        |              |                                      |              |                      |       |                                      |       |
| Weekend                                       | 1                    | -     | 1                                    | -     | 1                      | -            | 1                                    | -            | 1                    | -     | 1                                    | -     |
| Weekday                                       | 0.48(0.09;2.59)      | 0.347 | 0.25(0.04;1.43)                      | 0.106 | 1.98(0.95;4.13)        | 0.063        | 2.02(0.99;4.13)                      | 0.053        | 1.28(0.68;2.38)      | 0.399 | 0.92(0.42;2.02)                      | 0.824 |
| <b>Weight status</b>                          |                      |       |                                      |       |                        |              |                                      |              |                      |       |                                      |       |
| Non-overweight                                | 1                    | -     | 1                                    | -     | 1                      | -            | 1                                    | -            | 1                    | -     | 1                                    | -     |
| Overweight                                    | 0.85(0.41;1.73)      | 0.609 | 0.96(0.47;1.97)                      | 0.907 | 0.44(0.30;0.68)        | 0.002        | 0.44(0.28;0.69)                      | 0.003        | 0.84(0.36;1.91)      | 0.635 | 0.87(0.35;2.15)                      | 0.731 |
| <b>Total sleep duration (h)</b>               | 0.85 (0.47;1.57)     | 0.572 | 0.86(0.48;1.52)                      | 0.560 | 1.20(0.95;1.53)        | 0.113        | 1.27(1.01;1.59)                      | 0.039        | 0.84 (0.56;1.26)     | 0.361 | 0.88(0.61;1.27)                      | 0.456 |

<sup>a</sup>Adjusted by gender, age, screen use, physical activity, type of school, weight status, maternal education, day of food intake report, and total sleep duration.  
Bold values denote statistical significance at the  $p < 0.05$  level.
